# Supplementary material
Source: MDPI journal article supplement (https://www.mdpi.com/2073-4352/12/1/115)
Supplement: s1 [file s1]

Supplementary Material

# Nanosheet-Assembled MnO<sub>2</sub>-Integrated Electrode Based on the Low-temperature and Green Chemical Route

Xiaoli Wang<sup>1</sup>, Yin Wang<sup>2\*</sup> and Xinyu Zhao<sup>2\*</sup>

<sup>1</sup> Liaoning Key Laboratory of Chemical Additive Synthesis and Separation, College of Chemistry and Environment Engineering, Yingkou Institute of Technology, Yingkou 115014, China; wangxl@yku.edu.cn

<sup>2</sup> College of Chemistry and Materials Science, Inner Mongolia Key Laboratory of Carbon Nanomaterials and Inner Mongolia Key Laboratory for the Natural Products Chemistry and Functional Molecular Synthesis, Inner Mongolia Minzu University, Tongliao 028000, China

\* Correspondence: ywang@imn.edu.cn (Y.W.); xyzhao@imn.edu.cn (X.Z.)

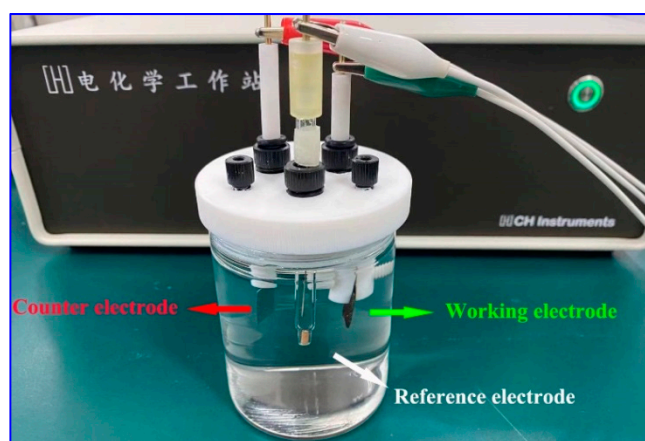

Figure S1. Photographs of the three-electrode testing system.

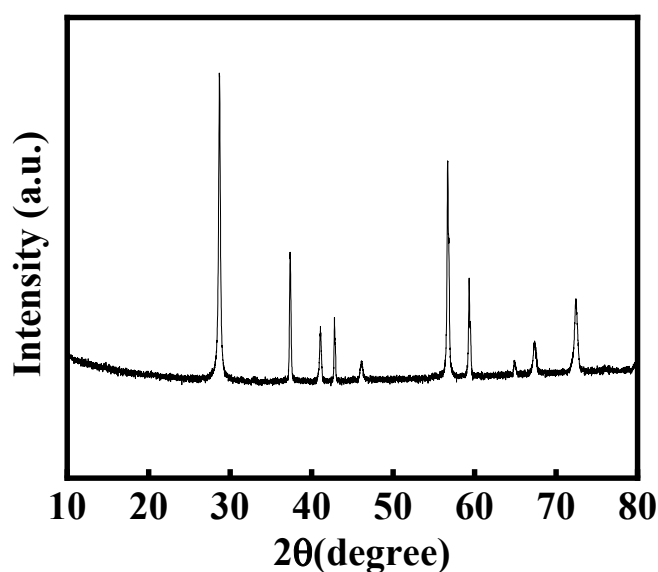

Figure S2. XRD pattern of the commercial MnO<sub>2</sub> powder.

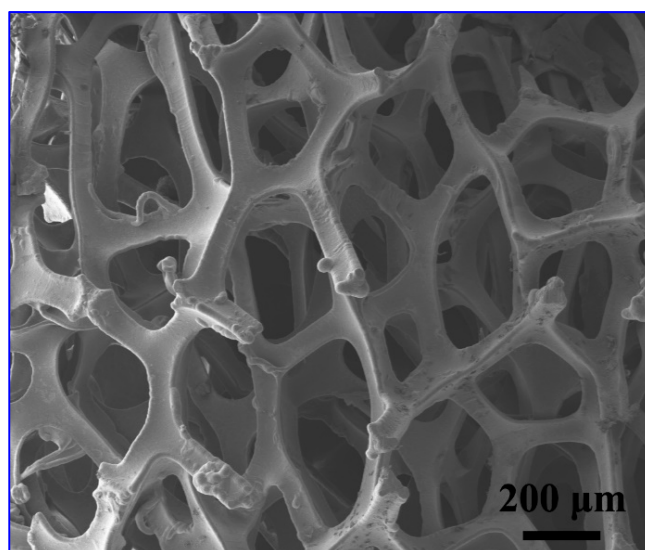

**Figure S3.** SEM image of the pristine 3D macroporous nickel foam, in which sub-millimeter pores can be clearly observed.

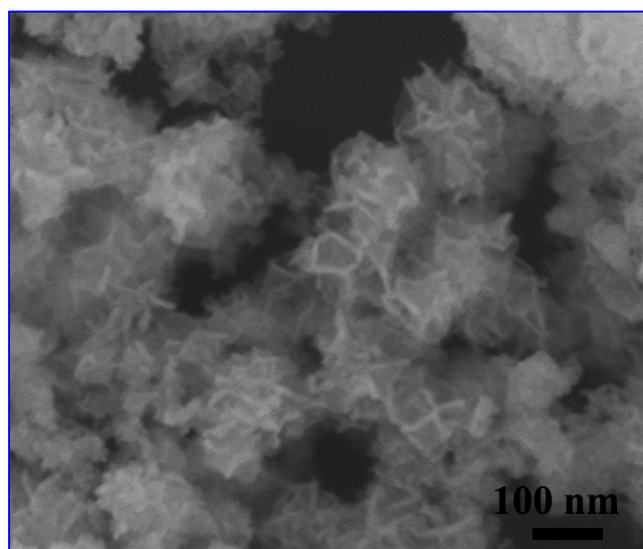

**Figure S4.** SEM image of the MnO<sub>2</sub> powder prepared by the low-temperature redox precipitation method.

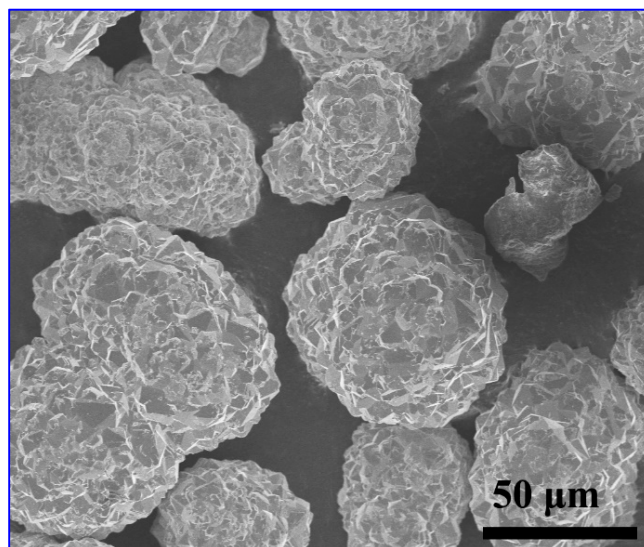

Figure S5. SEM image of the commercial MnO<sub>2</sub> powder.

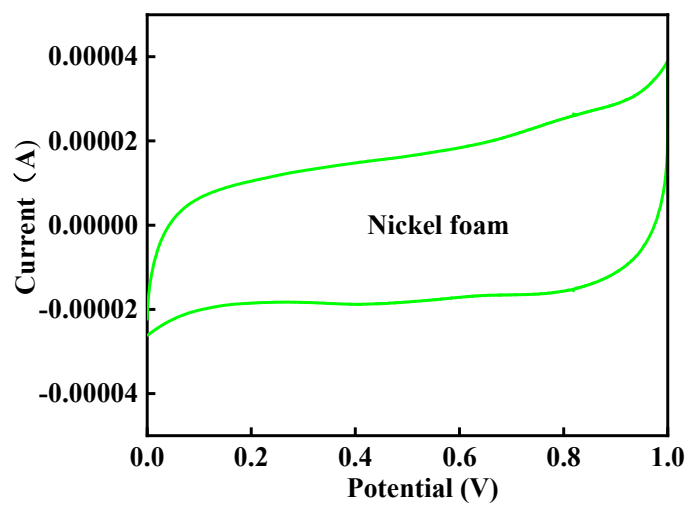

Figure S6. CV curve of the pure nickel foam at 10 mV s<sup>-1</sup>.

**Table S1.** Comparison of the supercapacitor performances of the reported MnO<sub>2</sub>-based electrodes in the aqueous electrolytes.

| Morphology/Method                                           | Capacitance (F/g) | Current density         | Electrolyte                           | Ref.      |
|-------------------------------------------------------------|-------------------|-------------------------|---------------------------------------|-----------|
| Nanosheet/electrochemical deposition                        | 201               | 1 A g <sup>-1</sup>     | 1 M Na <sub>2</sub> SO <sub>4</sub>   | [1]       |
| Nanoflower/electrochemical deposition                       | 314               | 1 A g <sup>-1</sup>     | 0.5 M Na <sub>2</sub> SO <sub>4</sub> | [2]       |
| Nanosphere/soft template                                    | 214               | 2 mA cm <sup>-2</sup>   | 0.5 M Na <sub>2</sub> SO <sub>4</sub> | [3]       |
| MnO <sub>2</sub> @MnO <sub>2</sub> core-shell/hydrothermal  | 150.3             | 0.1 A g <sup>-1</sup>   | 1.0 M LiOH                            | [4]       |
| Nanowire/electrochemical deposition                         | 350               | 0.1 mA cm <sup>-2</sup> | 0.1 M Na <sub>2</sub> SO <sub>4</sub> | [5]       |
| Nanotube arrays/template                                    | 210               | 1.9 A g <sup>-1</sup>   | 0.5 M Na <sub>2</sub> SO <sub>4</sub> | [6]       |
| Nanowire arrays/template                                    | 231               | 0.5 A g <sup>-1</sup>   | 0.5 M Na <sub>2</sub> SO <sub>4</sub> |           |
| r-GO and MnO <sub>2</sub> /hydrothermal                     | 263               | 5 mA cm <sup>-2</sup>   | 1 M Na <sub>2</sub> SO <sub>4</sub>   | [7]       |
| Nanosheet on carbon fiber/hydrothermal                      | 336               | 1 A g <sup>-1</sup>     | 1 M Na <sub>2</sub> SO <sub>4</sub>   | [8]       |
| Nanosheet/chelation-mediated                                | 325               | 1 A g <sup>-1</sup>     | 0.5 M Na <sub>2</sub> SO <sub>4</sub> | [9]       |
| MnO <sub>2</sub> /graphene/Ni/electrochemical deposition    | 292.8             | 10 mV s <sup>-1</sup>   | 0.5 M Na <sub>2</sub> SO <sub>4</sub> | [10]      |
| Nanosheet on the nickel foam/low-temperature chemical route | 445.89            | 1 A g <sup>-1</sup>     | 1 M Na <sub>2</sub> SO <sub>4</sub>   | This work |

## References

- Kundu, M.; Liu, L.F. Direct growth of mesoporous MnO<sub>2</sub> nanosheet arrays on nickel foam current collectors for high-performance pseudocapacitors. *J. Power Sources* **2013**, *243*, 676-681.
- Li, W.Y.; Xu, K.B.; Li, B.; Sun, J.Q.; Jiang, F.R.; Yu, Z.S.; Zou, R.J.; Chen, Z.G.; Hu, J.Q. MnO<sub>2</sub> nanoflower arrays with high rate capability for flexible supercapacitors. *ChemElectroChem* **2014**, *1*, 1003-1007.
- Wang, P.; Zhao, Y.J.; Wen, L.X.; Chen, J.F.; Lei, Z.G. Ultrasound-microwave-assisted synthesis of MnO<sub>2</sub> supercapacitor electrode materials. *Ind. Eng. Chem. Res.* **2014**, *53*, 20116-20123.
- Liu, Q.; Ji, S.; Yang, J.; Wang, H.; Pollet, B.G.; Wang, R. Enhanced Cycleability of Amorphous MnO<sub>2</sub> by Covering on  $\alpha$ -MnO<sub>2</sub> Needles in an Electrochemical Capacitor. *Materials* **2017**, *10*, 988-997.
- Wu, M.S. Electrochemical capacitance from manganese oxide nanowire structure synthesized by cyclic voltammetric electro-deposition. *Appl. Phys. Lett.* **2005**, *87*, 153102-153103.
- Grote, F.; Kühnel, R.S.; Balducci, A.; Lei, Y. Template assisted fabrication of free-standing MnO<sub>2</sub> nanotube and nanowire arrays. *Appl. Phys. Lett.* **2014**, *104*, 53904-53907.
- Yang, W.L.; Gao, Z.; Wang, J.; Wang, B.; Liu, Q.; Li, Z.S.; Manna, T.; Yang, P.P.; Zhang, M.L.; Liu, L.H. Synthesis of reduced graphene nanosheet/urchin-like manganese dioxide composite and high performance as supercapacitor electrode. *Electrochim. Acta* **2012**, *69*, 112-119.
- Xu, B.; Yu, L.; Sun, M.; Ye, F.; Zhong, Y.H.; Cheng, G.; Wang, H.; Mai, Y.L. One-pot hydrothermal synthesis of novel 3D starfish-like  $\delta$ -MnO<sub>2</sub> nanosheets on carbon fiber paper for high-performance supercapacitors. *RSC Adv.* **2017**, 14910-14916.
- Pang, M.J.; Long, G.H.; Jiang, S.; Ji, Y.; Han, W.; Wang, B.; Liu, X.L.; Xi, Y.L. One pot low-temperature growth of hierarchical  $\delta$ -MnO<sub>2</sub> nanosheets on nickel foam for supercapacitor applications. *Electrochimica Acta* **2015**, *161*, 297-304.
- Liu, R.; Jiang, R.; Chu, Y.H.; Yang, W.D. Facile fabrication of MnO<sub>2</sub>/graphene/Ni foam composites for high-performance supercapacitors. *Nanomaterials* **2021**, *11*, 2736-2743.
